# Supplementary material
Source: ML conference proceedings conference paper supplement (https://openreview.net/forum?id=H7qVZ0Zu8E)
Supplement: supplementary_material [file attachment]

## 788 Appendix

### 789 A Proof for Lemma 3

790 **1.** The statement follows readily from the following facts. Smoothness implies that if  $\alpha^+ \leq \frac{\delta}{L_f}$ ,  
 791 Algorithm 2 terminates. Therefore, it must be  $\alpha^+ \geq \frac{\delta}{L_f}$ .

**2.** The lower bound in (8) follows readily from the established inequality  $\alpha^+ \geq \frac{\delta}{L_f}$  and  $\alpha^+ \leq \gamma\alpha$ .  
 Furthermore, it follows from the strong convexity of  $f$  that

$$f(x^+) \geq f(x) + \langle \nabla f(x), x^+ - x \rangle + \frac{\mu}{2} \|x^+ - x\|^2.$$

792 Therefore,  $\alpha^+$  cannot exceed  $\frac{\delta}{\mu}$ , which together with  $\alpha^+ \leq \gamma\alpha$  proves the upper bound in (8).

**3.** Let us introduce the function  $f_d(x) = f(x) + \langle d, x \rangle$ . Notice that  $f_d$  inherits the same smoothness  
 and (strong) convexity property of  $f$ . The termination condition in Algorithm 2 can be rewritten in  
 terms of  $f_d(x)$  as following:

$$f_d(x^+) \leq f_d(x) + \langle \nabla f_d(x), x^+ - x \rangle + \frac{\delta}{2\alpha} \|x^+ - x\|^2.$$

793 Using  $x^+ - x = d$ , the condition above reads

$$f_d(x - \alpha^+ d) \leq f_d(x) - \alpha^+ \left(1 - \frac{\delta}{2}\right) \|d\|^2. \quad (13)$$

794 Because of convexity of  $f_d$ , if (13) holds for some  $\alpha^+$ , then it holds for any  $\alpha \in [0, \alpha^+]$ .  $\square$

### 795 B Proof of Theorem 4

796 We establish the proof under the weaker requirements on  $f_i$  than what stated in Assumption 1 and  
 797 postulated in the theorem, namely each  $f_i$  is assumed *locally* smooth and strongly convex.

798 Our first result determines the relationship between the values of the merit function (11) in two  
 799 consecutive iterations. We have the following.

800 **Lemma 7.** *The update  $(\mathbf{D}^k, \mathbf{X}^k) \rightarrow (\mathbf{D}^{k+1}, \mathbf{X}^{k+1})$  satisfies*

$$\begin{aligned} V^{k+1} = & \|\mathbf{X}^k - \mathbf{X}^*\|^2 + (\alpha^k)^2 \|\mathbf{D}^k - \mathbf{D}^*\|_M^2 \\ & - \|\mathbf{X}^k - \mathbf{X}^{k+1}\|^2 - (\alpha^k)^2 \|\mathbf{D}^k - \mathbf{D}^{k+1}\|_M^2 \\ & + 2\alpha^k \langle \nabla F(\mathbf{X}^{k+1/2}) - \nabla F(\mathbf{X}^*), \mathbf{X}^* - \mathbf{X}^{k+1} \rangle. \end{aligned} \quad (14)$$

801 *Proof.* See Appendix C.1.  $\square$

802 We proceed to bound the inner-product above in terms the  $X$ -sequence. Invoking the properties of  
 803 the backtracking (Lemma 8) and local strong convexity, we obtain the following.

804 **Lemma 8.** *The following holds:*

$$\langle \nabla F(\mathbf{X}^{k+1/2}) - \nabla F(\mathbf{X}^*), \mathbf{X}^* - \mathbf{X}^{k+1} \rangle \leq \frac{\delta}{2\alpha^k} \|\mathbf{X}^{k+1} - \mathbf{X}^{k+1/2}\|^2 - \frac{\mu^k}{2} \|\mathbf{X}_k^{k+1/2} - \mathbf{X}^*\|^2,$$

805 where  $\mu^k$  is the local strong convexity constant of  $f_i$  along the segment  $[\mathbf{X}^{k+1/2}, \mathbf{X}^*]$ .

806 *Proof.* See Appendix C.2.  $\square$

807 Combining Lemma 7 and Lemma 8, we obtain the following.

808 **Lemma 9.** For any  $c \leq 1/2$  and  $\{\gamma^k \geq 1\}$ , it holds:

$$\begin{aligned} V^{k+1} &\leq \|\mathbf{X}^k - \mathbf{X}^*\|^2 + (\alpha^k)^2 \|\mathbf{D}^k - \mathbf{D}^*\|_M^2 \\ &\quad - \mu^k \alpha^k \|\mathbf{X}_k^{k+1/2} - \mathbf{X}^*\|^2 \\ &\quad - \left\langle \mathbf{X}^k, c(I - \widetilde{W})\mathbf{X}^k \right\rangle - (\alpha^k)^2 \left\| c(I - \widetilde{W}) \left( \nabla F(\mathbf{X}^{k+1/2}) + \mathbf{D}^k \right) \right\|_M^2. \end{aligned} \quad (15)$$

809 *Proof.* See Appendix C.3.  $\square$

810 To achieve contraction in (15) we split the aiding term  $-\mu^k \alpha^k \|\mathbf{X}_k^{k+1/2} - \mathbf{X}^*\|^2 = -\frac{\mu^k \alpha^k}{2} \|\mathbf{X}_k^{k+1/2} - \mathbf{X}^*\|^2 - \frac{\mu^k \alpha^k}{2} \|\mathbf{X}_k^{k+1/2} - \mathbf{X}^*\|^2$  and use each to control primal and dual errors, as detailed next.

812 Define  $A := c(I - \widetilde{W})$  for notational convenience. Using the definitions of  $r^k$  and  $g^k$  as given in (10) and (9), respectively, the following lemma allows one to control the last two terms in (15) via  $\frac{\mu^k \alpha^k}{2} \|\mathbf{X}_k^{k+1/2} - \mathbf{X}^*\|^2$ .

815 **Lemma 10.** For any  $c < 1/2$  and  $\{\gamma^k \geq 1\}$ , it holds:

$$\begin{aligned} &-\frac{\mu^k \alpha^k}{2} \|\mathbf{X}^{k+1/2} - \mathbf{X}^*\|^2 - \langle \mathbf{X}^k, A\mathbf{X}^k \rangle - (\alpha^k)^2 \left\| A \left( \nabla F(\mathbf{X}^{k+1/2}) + \mathbf{D}^k \right) \right\|_M^2 \\ &\leq -\max \left( (r^k)^2, \frac{\mu^k \alpha^k (g^k [1 - r^k]_+)^2}{2} \right) c^2 (1 - \lambda_2(\widetilde{W}))^2 (\alpha^k)^2 \|\mathbf{D}^k - \mathbf{D}^*\|_M^2. \end{aligned} \quad (16)$$

816 *Proof.* See Appendix C.4.  $\square$

It remains to control  $\|\mathbf{X}^k - \mathbf{X}^*\|^2$  using  $\frac{\mu^k \alpha^k}{2} \|\mathbf{X}_k^{k+1/2} - \mathbf{X}^*\|^2$ . Noting

$$\mathbf{X}^{k+1/2} = (I - A)\mathbf{X}^k \quad \text{and} \quad \mathbf{X}^* = (I - A)\mathbf{X}^*,$$

817 the term  $\|\mathbf{X}^{k+1/2} - \mathbf{X}^*\|^2$  can be lower bounded as

$$\|\mathbf{X}^{k+1/2} - \mathbf{X}^*\|^2 \geq (1 - c(1 - \lambda_m(\widetilde{W})))^2 \|\mathbf{X}^k - \mathbf{X}^*\|^2. \quad (17)$$

818 Using in (9) the bounds derived in Lemma 10 and (17) yields

$$\begin{aligned} &V^{k+1} \\ &\leq \left( 1 - \mu^k \alpha^k \frac{(1 - c(1 - \lambda_n(\widetilde{W})))^2}{2} \right) \|\mathbf{X}^k - \mathbf{X}^*\|_{I - c(I - \widetilde{W})}^2 \\ &\quad + \left( 1 - \max \left( (r^k)^2, \frac{\mu^k \alpha^k (g^k [1 - r^k]_+)^2}{2} \right) c^2 (1 - \lambda_2(\widetilde{W}))^2 \right) (\alpha^k)^2 \|\mathbf{D}^k - \mathbf{D}^*\|_M^2 \\ &\leq \left( 1 - \min \left[ \mu^k \alpha^k \frac{(1 - c(1 - \lambda_n(\widetilde{W})))^2}{2}, \max \left( (r^k)^2, \frac{\mu^k \alpha^k (g^k [1 - r^k]_+)^2}{2} \right) c^2 (1 - \lambda_2(\widetilde{W}))^2 \right] \right) \\ &\quad \times \max \left[ 1, \left( \frac{\alpha^k}{\alpha_{k-1}} \right)^2 \right] \times V^k. \end{aligned} \quad (18)$$

819 This proves (12).

820 Since  $f_i$ 's are assumed to be only locally smooth and strongly convex, it remains to show that the sequence generated by the algorithm is bounded. This is proved below under the condition  $r^k > r$ , for some  $r$ . Notice that if the  $f_i$  are globally smooth and strongly convex, boundedness of the iterates is granted with no extra conditions.

824 **Lemma 11.** In the setting above, further assume that  $r_k \geq r$ , for some  $r > 0$ . Then, sequence  $\{\mathbf{X}^k, \mathbf{D}^k\}$  generated by Algorithm 1 is bounded.

826 *Proof.* See Appendix D.  $\square$

827 This completes the proof of 4.  $\square$

## 828 C Proof of the Intermediate Results in Appendix B

### 829 C.1 Proof of Lemma 7

830 From the update of  $\mathbf{X}^{k+1}$  and the facts  $\mathbf{D}^{k+1} - \mathbf{D}^* \in \text{span}(I - \widetilde{W})$  and  $\mathbf{X}^* \in \text{null}(I - \widetilde{W})$ , we  
831 have:

$$\begin{aligned}
 & \langle \mathbf{D}^{k+1} - \mathbf{D}^*, \mathbf{X}^{k+1} - \mathbf{X}^* \rangle \\
 &= \langle \mathbf{D}^{k+1} - \mathbf{D}^*, \mathbf{X}^k - \alpha^k \nabla F(\mathbf{X}^{k+1/2}) - \alpha^k \mathbf{D}^{k+1} - \mathbf{X}^* \rangle \\
 &= \left\langle \mathbf{D}^{k+1} - \mathbf{D}^*, \alpha^k c^{-1} (I - \widetilde{W})^\dagger (\mathbf{D}^{k+1} - \mathbf{D}^k) + \alpha^k \mathbf{D}^k - \alpha^k \mathbf{D}^{k+1} \right\rangle \\
 &= \alpha^k \langle \mathbf{D}^{k+1} - \mathbf{D}^*, \mathbf{D}^{k+1} - \mathbf{D}^k \rangle_M.
 \end{aligned} \tag{19}$$

832 Using the equality above, we can write

$$\begin{aligned}
 & \alpha^k \langle \mathbf{X}^k - \mathbf{X}^*, \nabla F(\mathbf{X}^{k+1/2}) - \nabla F(\mathbf{X}^*) \rangle \\
 &= \alpha^k \left\langle \mathbf{X}^k - \mathbf{X}^*, \frac{1}{\alpha^k} (\mathbf{X}^k - \mathbf{X}^{k+1}) - \mathbf{D}^{k+1} + \mathbf{D}^* \right\rangle \\
 &= \langle \mathbf{X}^k - \mathbf{X}^*, \mathbf{X}^k - \mathbf{X}^{k+1} \rangle - \alpha^k \langle \mathbf{D}^{k+1} - \mathbf{D}^*, \mathbf{X}^k - \mathbf{X}^* \rangle \\
 &= \langle \mathbf{X}^k - \mathbf{X}^*, \mathbf{X}^k - \mathbf{X}^{k+1} \rangle + \alpha^k \langle \mathbf{D}^{k+1} - \mathbf{D}^*, \mathbf{X}^{k+1} - \mathbf{X}^k \rangle - \alpha^k \langle \mathbf{D}^{k+1} - \mathbf{D}^*, \mathbf{X}^{k+1} - \mathbf{X}^* \rangle \\
 &= \langle \mathbf{X}^k - \mathbf{X}^*, \mathbf{X}^k - \mathbf{X}^{k+1} \rangle + \alpha^k \langle \mathbf{D}^{k+1} - \mathbf{D}^*, \mathbf{X}^{k+1} - \mathbf{X}^k \rangle - (\alpha^k)^2 \langle \mathbf{D}^{k+1} - \mathbf{D}^*, \mathbf{D}^{k+1} - \mathbf{D}^k \rangle_M \\
 &= \langle (\mathbf{X}^k - \alpha^k \mathbf{D}^{k+1}) - \mathbf{X}^* + \alpha^k \mathbf{D}^*, \mathbf{X}^k - \mathbf{X}^{k+1} \rangle - (\alpha^k)^2 \langle \mathbf{D}^{k+1} - \mathbf{D}^*, \mathbf{D}^{k+1} - \mathbf{D}^k \rangle_M \\
 &= \langle \mathbf{X}^{k+1} - \mathbf{X}^* + \alpha^k \nabla F(\mathbf{X}^{k+1/2}) - \alpha^k \nabla F(\mathbf{X}^*), \mathbf{X}^k - \mathbf{X}^{k+1} \rangle - (\alpha^k)^2 \langle \mathbf{D}^{k+1} - \mathbf{D}^*, \mathbf{D}^{k+1} - \mathbf{D}^k \rangle_M \\
 &= \langle \mathbf{X}^{k+1} - \mathbf{X}^*, \mathbf{X}^k - \mathbf{X}^{k+1} \rangle + \alpha^k \langle \nabla F(\mathbf{X}^{k+1/2}) - \nabla F(\mathbf{X}^*), \mathbf{X}^k - \mathbf{X}^{k+1} \rangle \\
 &\quad - (\alpha^k)^2 \langle \mathbf{D}^{k+1} - \mathbf{D}^*, \mathbf{D}^{k+1} - \mathbf{D}^k \rangle_M,
 \end{aligned}$$

833 where the first and fifth equations follow from the update of  $\mathbf{X}^{k+1}$  while in the third equation we  
834 used (19).

835 Finally, rearranging the terms above, yields

$$\begin{aligned}
 & -2\alpha^k \langle \nabla F(\mathbf{X}^{k+1/2}) - \nabla F(\mathbf{X}^*), \mathbf{X}^* - \mathbf{X}^{k+1} \rangle \\
 &= 2 \langle \mathbf{X}^{k+1} - \mathbf{X}^*, \mathbf{X}^k - \mathbf{X}^{k+1} \rangle - 2(\alpha^k)^2 \langle \mathbf{D}^{k+1} - \mathbf{D}^*, \mathbf{D}^{k+1} - \mathbf{D}^k \rangle_M.
 \end{aligned} \tag{20}$$

836 The final result (14) follows from (20) and  $2 \langle \mathbf{a}, \mathbf{b} \rangle = \|\mathbf{a} + \mathbf{b}\|^2 - \|\mathbf{a}\|^2 - \|\mathbf{b}\|^2$ .  $\square$

### 837 C.2 Proof for Lemma 8

838 Define

$$D(\mathbf{X}) = F(\mathbf{X}) + \langle \mathbf{D}^*, \mathbf{X} \rangle, \tag{21}$$

839 where  $(\mathbf{D}^*, \mathbf{X}^*)$  is a fixed-point of Algorithm 1,

840 Using the definition of  $D(\mathbf{X})$  and the fact that  $\nabla F(\mathbf{X}^*) + \mathbf{D}^* = 0$ ,  $\langle \nabla F(\mathbf{X}^{k+1/2}) - \nabla F(\mathbf{X}^*), \mathbf{X}^* -$   
841  $\mathbf{X}^{k+1} \rangle$  can be bounded as

$$\begin{aligned}
& \langle \nabla F(\mathbf{X}^{k+1/2}) - \nabla F(\mathbf{X}^*), \mathbf{X}^* - \mathbf{X}^{k+1} \rangle = \langle \nabla D(\mathbf{X}^{k+1/2}), \mathbf{X}^* - \mathbf{X}^{k+1} \rangle \\
& = \langle \nabla D(\mathbf{X}^{k+1/2}), \mathbf{X}^* - \mathbf{X}^{k+1/2} \rangle - \langle \nabla D(\mathbf{X}^{k+1/2}), \mathbf{X}^{k+1} - \mathbf{X}^{k+1/2} \rangle \\
& \leq D(\mathbf{X}^*) - D(\mathbf{X}^{k+1/2}) - \langle \nabla D(\mathbf{X}^{k+1/2}), \mathbf{X}^{k+1} - \mathbf{X}^{k+1/2} \rangle - \frac{\mu^k}{2} \|\mathbf{X}_k^{k+1/2} - \mathbf{X}^*\|^2 \\
& \leq D(\mathbf{X}^{k+1}) - D(\mathbf{X}^{k+1/2}) - \langle \nabla D(\mathbf{X}^{k+1/2}), \mathbf{X}^{k+1} - \mathbf{X}^{k+1/2} \rangle - \frac{\mu^k}{2} \|\mathbf{X}_k^{k+1/2} - \mathbf{X}^*\|^2 \\
& = D(\mathbf{X}^{k+1}) - \left( D(\mathbf{X}^{k+1/2}) + \langle \nabla D(\mathbf{X}^{k+1/2}), \mathbf{X}^{k+1} - \mathbf{X}^{k+1/2} \rangle + \frac{1}{2\alpha^k} \|\mathbf{X}^{k+1} - \mathbf{X}^{k+1/2}\|^2 \right) \\
& \quad + \frac{\delta}{2\alpha^k} \|\mathbf{X}^{k+1} - \mathbf{X}^{k+1/2}\|^2 - \frac{\mu}{2} \|\mathbf{X}_k^{k+1/2} - \mathbf{X}^*\|^2 \\
& = F(\mathbf{X}^{k+1}) - \left( F(\mathbf{X}^{k+1/2}) + \langle \nabla F(\mathbf{X}^{k+1/2}), \mathbf{X}^{k+1} - \mathbf{X}^{k+1/2} \rangle + \frac{\delta}{2\alpha^k} \|\mathbf{X}^{k+1} - \mathbf{X}^{k+1/2}\|^2 \right) \\
& \quad + \frac{\delta}{2\alpha^k} \|\mathbf{X}^{k+1} - \mathbf{X}^{k+1/2}\|^2 - \frac{\mu^k}{2} \|\mathbf{X}_k^{k+1/2} - \mathbf{X}^*\|^2 \\
& \leq \frac{\delta}{2\alpha^k} \|\mathbf{X}^{k+1} - \mathbf{X}^{k+1/2}\|^2 - \frac{\mu^k}{2} \|\mathbf{X}_k^{k+1/2} - \mathbf{X}^*\|^2,
\end{aligned}$$

842 where the first inequality follow from the the strong convexity of  $D(\mathbf{X})$  on the segment  $[\mathbf{X}^{k+1/2}, \mathbf{X}^*]$ ;  
843 and in the last inequality we used the algorithm update.  $\square$

### 844 C.3 Proof for Lemma 9

845 Uniting Lemma 7 and Lemma 8, we can write

$$\begin{aligned}
V^{k+1} & \leq \|\mathbf{X}^k - \mathbf{X}^*\|^2 + (\alpha^k)^2 \|\mathbf{D}^k - \mathbf{D}^*\|_M^2 \\
& \quad - \mu^k \alpha^k \|\mathbf{X}_k^{k+1/2} - \mathbf{X}^*\|^2 \\
& \quad - (1 - \delta) (\|\mathbf{X}^k - \mathbf{X}^{k+1}\|^2 + (\alpha^k)^2 \|\mathbf{D}^k - \mathbf{D}^{k+1}\|_M^2) \\
& \quad + \delta \left( \|\mathbf{X}^{k+1} - \mathbf{X}^{k+1/2}\|^2 - \|\mathbf{X}^k - \mathbf{X}^{k+1}\|^2 - (\alpha^k)^2 \|\mathbf{D}^k - \mathbf{D}^{k+1}\|_M^2 \right).
\end{aligned} \tag{22}$$

846 Consider the first and second term:

$$\begin{aligned}
& \|\mathbf{X}^{k+1} - \mathbf{X}^{k+1/2}\|^2 - \|\mathbf{X}^k - \mathbf{X}^{k+1}\|^2 \\
& = (\alpha^k)^2 \left( \|\mathbf{D}^{k+1/2}\|^2 - \|\mathbf{D}^{k+1/2} + \frac{c}{\alpha^k} (I - \widetilde{W}) \mathbf{X}^k \|^2 \right) \\
& = - \|c(I - \widetilde{W}) \mathbf{X}^k\|^2 - \alpha^k \langle \nabla \mathbf{D}^{k+1/2}, c(I - \widetilde{W}) \mathbf{X}^k \rangle \\
& = - \|c(I - \widetilde{W}) \mathbf{X}^k\|^2 - \alpha^k \langle \nabla \mathbf{D}^{k+1/2}, c(I - \widetilde{W}) \mathbf{X}^k \rangle \\
& = - \|c(I - \widetilde{W}) \mathbf{X}^k\|^2 + \alpha^k \left\langle \left( c(I - \widetilde{W}) - I \right) \left( \nabla F(\mathbf{X}^{k+1/2}) + \mathbf{D}^k \right), c(I - \widetilde{W}) \mathbf{X}^k \right\rangle.
\end{aligned} \tag{23}$$

847 Proceeding with  $\|\mathbf{D}^k - \mathbf{D}^{k+1}\|_M^2$ , we have

$$\begin{aligned}
& -(\alpha^k)^2 \|\mathbf{D}^k - \mathbf{D}^{k+1}\|_M^2 \\
& = -(\alpha^k)^2 \| -c(I - \widetilde{W}) \left( \nabla F(\mathbf{X}^{k+1/2}) + \mathbf{D}^k \right) + \frac{c}{\alpha^k} (I - \widetilde{W}) \mathbf{X}^k \|_M^2 \\
& = -\|c(I - \widetilde{W}) \mathbf{X}^k\|_M^2 \\
& \quad + \alpha^k \langle Mc(I - \widetilde{W}) \left( \nabla F(\mathbf{X}^{k+1/2}) + \mathbf{D}^k \right), c(I - \widetilde{W}) \mathbf{X}^k \rangle \\
& \quad - (\alpha^k)^2 \|c(I - \widetilde{W}) \left( \nabla \nabla F(\mathbf{X}^{k+1/2}) + \mathbf{D}^k \right)\|_M^2 \\
& = -\|c(I - \widetilde{W}) \mathbf{X}^k\|_M^2 \\
& \quad + \alpha^k \left\langle \left( I - c(I - \widetilde{W}) \right) \left( \nabla F(\mathbf{X}^{k+1/2}) + \mathbf{D}^k \right), c(I - \widetilde{W}) \mathbf{X}^k \right\rangle \\
& \quad - (\alpha^k)^2 \|c(I - \widetilde{W}) \left( \nabla F(\mathbf{X}^{k+1/2}) + \mathbf{D}^k \right)\|_M^2 \\
& = \|c(I - \widetilde{W}) \mathbf{X}^k\|^2 - c \langle \mathbf{X}^k, (I - \widetilde{W}) \mathbf{X}^k \rangle \\
& \quad + \alpha^k \left\langle \left( I - c(I - \widetilde{W}) \right) \left( \nabla F(\mathbf{X}^{k+1/2}) + \mathbf{D}^k \right), c(I - \widetilde{W}) \mathbf{X}^k \right\rangle \\
& \quad - (\alpha^k)^2 \|c(I - \widetilde{W}) \left( \nabla F(\mathbf{X}^{k+1/2}) + \mathbf{D}^k \right)\|_M^2,
\end{aligned} \tag{24}$$

848 where last two equalities follow from the definition of  $M = c^{-1}(I - \widetilde{W})^\dagger - I$ .

849 Summing (23) and (24), we obtain

$$\begin{aligned}
& \|\mathbf{X}^{k+1} - \mathbf{X}^{k+1/2}\|^2 - \|\mathbf{X}^k - \mathbf{X}^{k+1}\|^2 - (\alpha^k)^2 \|\mathbf{D}^k - \mathbf{D}^{k+1}\|_M^2 \\
& = -c \langle \mathbf{X}^k, (I - \widetilde{W}) \mathbf{X}^k \rangle - (\alpha^k)^2 \|c(I - \widetilde{W}) \left( \nabla F(\mathbf{X}^{k+1/2}) + \mathbf{D}^k \right)\|_M^2.
\end{aligned}$$

850 The proof follows readily from the above equality, (22), and setting  $\delta = 1$ .  $\square$

#### 851 C.4 Proof for Lemma 10

852 To obtain decrease for dual variable, we should consider two estimates.

853 1. Firstly, using the definition of  $r^k$ , we can bound the last two terms in (15) as

$$\langle \mathbf{X}^k, A\mathbf{X}^k \rangle + (\alpha^k)^2 \left\| A \left( \nabla F(\mathbf{X}^{k+1/2}) + \mathbf{D}^k \right) \right\|_M^2 \geq (\alpha^k)^2 (r^k)^2 \|A(\mathbf{D}^k - \mathbf{D}^*)\|_M. \tag{25}$$

854 2. Using again the definition of  $r^k$  and the reverse triangle inequality we have

$$\begin{aligned}
r^k \|A(\mathbf{D}^k - \mathbf{D}^*)\|_M & \geq \left\| A \left( \nabla F(\mathbf{X}^{k+1/2}) + \mathbf{D}^k \right) \right\|_M \\
& \geq \|A(\mathbf{D}^k - \mathbf{D}^*)\|_M - \left\| A \left( \nabla F(\mathbf{X}^{k+1/2}) - F(\mathbf{X}^*) \right) \right\|_M.
\end{aligned}$$

855 Therefore,

$$\begin{aligned}
\left\| A \left( \nabla F(\mathbf{X}^{k+1/2}) - F(\mathbf{X}^*) \right) \right\|_M & \geq [1 - r_k]_+ \|A(\mathbf{D}^k - \mathbf{D}^*)\|_M \\
& \geq ([1 - r_k]_+) c(1 - \lambda_2(\widetilde{W})) \|\mathbf{D}^k - \mathbf{D}^*\|_M.
\end{aligned}$$

856 Using the definition of  $g_k$  yields

$$\|\mathbf{X}^{k+1/2} - \mathbf{X}^*\|^2 \geq (g^k [1 - r^k]_+)^2 (\alpha^k)^2 \|A(\mathbf{D}^k - \mathbf{D}^*)\|_M^2. \tag{26}$$

857 The desired expression (16) follows combining (25) and (26).

## 858 D Proof of Lemma 11

859 According to Lemma 9, we have the following inequality:

$$V^{k+1} \leq \|\mathbf{X}^k - \mathbf{X}^*\|^2 + (\alpha^k)^2 \|\mathbf{D}^k - \mathbf{D}^*\|_M^2 - \left\langle \mathbf{X}^k, c(I - \widetilde{W})\mathbf{X}^k \right\rangle - (\alpha^k)^2 \left\| c(I - \widetilde{W}) \left( \nabla F(\mathbf{X}^{k+1/2}) + \mathbf{D}^k \right) \right\|_M^2. \quad (27)$$

Using definition of  $r^k$ , (27) can be written in the following form:

$$V^{k+1} \leq \|\mathbf{X}^k - \mathbf{X}^*\|^2 + (\alpha^k)^2 (1 - r_k c^2 (1 - \lambda_2(\widetilde{W}))^2) \|\mathbf{D}^k - \mathbf{D}^*\|_M^2.$$

Further, using  $r_k \geq r$  and the definition of  $\gamma_k$ , we have

$$V^{k+1} \leq \max \left( 1, \left( \frac{k + \beta_1}{k + 1} \right)^{2\beta_2} (1 - r c^2 (1 - \lambda_2(\widetilde{W}))^2) \right) V^k.$$

Starting from some iteration  $k^*$ , telescoping the above inequality to  $k_0$ , yields

$$V^{k+1} \leq \prod_{j=0}^{k^*} \left( \left( \frac{k + \beta_1}{k + 1} \right)^{2\beta_2} (1 - r c^2 (1 - \lambda_2(\widetilde{W}))^2) \right) V^0 = R < \infty.$$

860 Using the definition of  $V^{k+1}$ , we have that  $\|\mathbf{X}^{k+1} - \mathbf{X}^*\| \leq R$ . It means that  $\alpha^k$  is bounded below  
861 by the inverse local Lipschitz constant. So,  $\|\mathbf{D}^{k+1} - \mathbf{D}^*\|$  is bounded too.

862 This completes the proof.  $\square$

## 863 E Proof for Corollary 4.1

Let us consider the value  $\rho_k$  from Theorem 4:

$$\rho^k := \min \left( \mu \alpha^k \frac{(1 - c(1 - \lambda_n(\widetilde{W})))^2}{2}, \max((r^k)^2, \mu \alpha^k \frac{(g^k [1 - r^k]_+)^2}{2}) c^2 (1 - \lambda_2(\widetilde{W}))^2 \right).$$

If we prove that  $\rho_k \geq \rho > 0$  then we can obtain an estimate for number of iterations to approach quality  $\varepsilon$ . Using the result of Theorem 4 and condition for  $\gamma_k$ , we have the following inequality:

$$(1 - \rho)^k \prod_{j=0}^k \left( \frac{k + \beta_1}{k + 1} \right)^{\beta_2} V^0 \leq \varepsilon$$

864 Note, for any  $\beta_1, \beta_2$  and enough big  $k$  we have that  $(1 - \rho)^k \prod_{j=0}^k \left( \frac{k + \beta_1}{k + 1} \right)^{\beta_2} V^0 \leq (1 - \rho/2)^k V^0 \leq$   
865  $\exp(-k\rho/2) V^0$ . It means, that to approach quality  $\varepsilon$  it is enough to perform

$$N = O\left(\frac{1}{\rho} \log(V^0/\varepsilon)\right) \quad (28)$$

866 steps of Algorithm 1.

867 Further, we consider different cases from Corollary 4.1 to obtain estimate for this value.

868 Firstly, note that according to Lemma 3 we have that  $\alpha^k \geq 1/(2L)$ .

1. If  $r^k \geq \frac{1}{2}$  than we have that  $\max((r^k)^2, \mu \alpha^k \frac{(g^k [1 - r^k]_+)^2}{2}) \geq \frac{1}{4}$  and

$$\frac{1}{\rho} \leq O \left( \max \left( \frac{\kappa}{(1 - c(1 - \lambda_m(\widetilde{W})))^2}, \frac{1}{c^2(1 - \lambda_2(\widetilde{W}))^2} \right) \right)$$

2. If  $r^k \geq (1/4)\sqrt{\kappa}$ , then we have

$$\frac{1}{\rho} \leq O \left( \frac{\kappa}{\min(c(1 - \lambda_2(\widetilde{W})), (1 - c(1 - \lambda_m(\widetilde{W}))))^2} \right).$$

869 On the other hand, if  $g^k \geq \frac{1}{2}$  we have the same result because  $\mu\alpha^k \geq (1/2)\kappa$ .

3. Finally, note that

$$\mu\alpha^k(g^k)^2 \geq \frac{\mu}{\alpha_k} \frac{1}{L^2} \geq \kappa^2,$$

where the first inequality holds because of smoothness and definition of  $g^k$ . The second because of upper bound on step size in Lemma 3. It immediately gives us

$$\frac{1}{\rho} \leq O \left( \left( \frac{\kappa}{\min \left( c, (1 - c(1 - \lambda_m(\widetilde{W}))) \right) \cdot (1 - \lambda_2(\widetilde{W}))} \right)^2 \right)$$

870 These three cases and estimation (28) complete the proof.

## 871 **F Proof of Theorem 5**

872 Similarly to the proof of Theorem 4, we prove Theorem 5 under the weaker assumption that each  $f_i$   
873 is locally smooth. Throughout the proof, we denote by  $L$  the smooth constant of  $f_i$ 's over the convex  
874 hull of the set  $\{\mathbf{X}^j\}_{j=0}^{k+1}$ .

Define

$$q_k = \max \left( 1, \frac{\alpha_k^2}{\alpha_{k-1}^2} \right).$$

According to Lemma 9, under  $\mu = 0$ , we have

$$V^{k+1} \leq V^k - (1 - \delta) (\|\mathbf{X}^k - \mathbf{X}^{k+1}\|^2 + \alpha_k^2 \|\mathbf{D}^k - \mathbf{D}^{k+1}\|_M^2).$$

Applying recursively the above inequality, yields

$$V^{k+1} \leq \left( \prod_{j=0}^k q_j \right) V^0 - (1 - \delta) \sum_{j=0}^k \left( \prod_{i=j+1}^k q_i \right) (\|\mathbf{X}^j - \mathbf{X}^{j+1}\|^2 + \alpha_j^2 \|\mathbf{D}^j - \mathbf{D}^{j+1}\|_M^2).$$

Therefore,

$$\min_{j \in [k]} V^j \leq \frac{\prod_{j=0}^k q_j}{1 + \sum_{j=1}^k \left( \prod_{i=j}^k q_i \right)} \frac{V^0}{1 - \delta}.$$

Note, that

$$1 \leq q_j \leq \left( \frac{k+1+\beta_1}{k+1} \right)^{2\beta_2}.$$

875 Define  $\overline{\beta}_1 := \lceil \beta_1 \rceil$ , and recalling

$$\begin{aligned} \min_{j \in [k]} V^j &\leq \frac{1}{k+1} \left( \frac{\prod_{j=1}^k (j + \beta_1 + 1)}{(k+1)!} \right)^{2\beta_2} \frac{V^0}{1 - \delta} \\ &\leq \frac{1}{k+1} \left( \frac{\prod_{j=1}^k (j + \overline{\beta}_1 + 1)}{(k+1)!(\overline{\beta}_1 + 1)!} \right)^{2\beta_2} \frac{V^0}{1 - \delta} \\ &= \frac{1}{k+1} \left( \frac{\prod_{j=k+1}^{k+\overline{\beta}_1+1} (j + \overline{\beta}_1)}{(\overline{\beta}_1 + 1)!} \right)^{2\beta_2} \frac{V^0}{1 - \delta} \\ &\leq \frac{1}{k+1} \left( \frac{(k + \overline{\beta}_1 + 1)^{\overline{\beta}_1}}{(\overline{\beta}_1 + 1)!} \right)^{2\beta_2} \frac{V^0}{1 - \delta} \\ &\leq \frac{c}{(k+1)^{1-2\beta_2\overline{\beta}_1}} V^0. \end{aligned}$$

876 The statement of the theorem follows using  $\alpha_k \geq \delta/2L$ , due to Lemma 3, where  $L$  is local smoothness  
877 constant.
